# Dual roles of the bZIP transcription factor PERIANTHIA in the control of floral architecture and homeotic gene expression

Annette T. Maier<sup>1,\*</sup>, Sandra Stehling-Sun<sup>1,\*†</sup>, Heike Wollmann<sup>1</sup>, Monika Demar<sup>1</sup>, Ray L. Hong<sup>2,‡</sup>, Silke Haubeiß<sup>1,§</sup>, Detlef Weigel<sup>1,2</sup> and Jan U. Lohmann<sup>1,3,¶</sup>

Flowers develop from floral meristems, which harbor stem cells that support the growth of floral organs. The MADS domain transcription factor AGAMOUS (AG) plays a central role in floral patterning and is required not only for the specification of the two reproductive organ types, but also for termination of stem cell fate. Using a highly conserved cis-regulatory motif as bait, we identified the bZIP transcription factor PERIANTHIA (PAN) as a direct regulator of AG in *Arabidopsis*. PAN and AG expression domains overlap, and mutations in either the PAN-binding site or PAN itself abolish the activity of a reporter devoid of redundant elements. Whereas under long-day conditions *pan* mutants have merely altered floral organ number, they display in addition typical AG loss-of-function phenotypes when grown under short days. Consistently, we found reduced AG RNA levels in these flowers. Finally, we show that PAN expression persists in *ag* mutant flowers, suggesting that PAN and AG are engaged in a negative-feedback loop, which might be mediated by the stem-cell-inducing transcription factor WUSCHEL (WUS).

**KEY WORDS:** PERIANTHIA, AGAMOUS, Stem cells, *Arabidopsis*

## INTRODUCTION

Flowers have attracted the attention of humanity for millennia, not only because of their beauty, but also because they give rise to fruits and seeds. As flowers are the sites of sexual reproduction of flowering plants, their proper development is essential for survival of the species. Evolution has brought about a dazzling array of floral phenotypes as flowering plants have found their way into virtually every ecological niche on land. Still, the molecular machinery that controls the identity and stereotypic arrangement of floral organs has been well conserved (Theissen et al., 1996). Flowers of the reference plant *Arabidopsis thaliana* contain four major organ types: sepals, petals, stamens and carpels, which are arranged in four concentric rings or whorls. Organ identity is specified by the overlapping activities of three classes of homeotic genes, termed A, B and C, as predicted in the ABC model (Bowman et al., 1991; Coen and Meyerowitz, 1991). The activity of a floral homeotic gene is typically confined to two adjacent whorls, with the A class represented by *APETALA1* (*AP1*) and *APETALA2* (*AP2*) acting in whorls one and two, the B class genes *APETALA3* (*AP3*) and *PISTILLATA* (*PI*) in whorls two and three, and the C class gene *AGAMOUS* (*AG*) in whorls three and four (reviewed by Lohmann and Weigel, 2002). With the exception of *AP2*, all floral homeotic genes code for MADS domain transcription factors. Essential co-regulators in this process are the MADS domain transcription factors of the SEPALLATA class (*SEP1*, *SEP2*, *SEP3* and *SEP4*), which form tetrameric complexes with different combinations of homeotic ABC factors (Ditta et al., 2004; Honma and Goto, 2001; Melzer et al., 2009; Pelaz et al., 2000).

While the primary function of floral homeotic genes appears to be the specification of floral organ identity, several of them have additional roles. The most prominent example is the C class gene *AG*. In addition to specifying reproductive organs, stamens and carpels, it has a key role in limiting stem cell proliferation in the center of emerging flowers (Bowman et al., 1989; Bowman et al., 1991; Mizukami and Ma, 1995; Sieburth et al., 1995).

Although the molecular nature of *AG* was uncovered almost two decades ago (Yanofsky et al., 1990) our understanding of *AG* regulation is far from complete. The proper spatiotemporal expression of *AG* RNA is dependent on sequences located in the second intron, which is one of the longest found in the *A. thaliana* genome (Sieburth and Meyerowitz, 1997). Functional characterization of this intragenic enhancer demonstrated that multiple redundant regulatory modules mediate the response to competing activating and repressing inputs (Bomblies et al., 1999; Busch et al., 1999; Deyholos and Sieburth, 2000). One of the most prominent direct regulators is the meristem identity factor LEAFY (*LFY*) (Busch et al., 1999; Parcy et al., 2002; Parcy et al., 1998), which acts in concert with the homeodomain transcription factor WUSCHEL (*WUS*) to activate *AG* in the center of developing flowers (Lohmann et al., 2001). Additional inputs are provided by *SEP3*, which can act as activator (Castillejo et al., 2005) or repressor of *AG* transcription (Sridhar et al., 2006), depending on the regulatory environment. Once *AG* transcription has been activated, an autoregulatory mechanism is in place to ensure stable expression throughout flower development (Gomez-Mena et al., 2005).

Important repressors of *AG* expression are LEUNIG (*LUG*) and SEUSS (*SEU*), which act as co-repressors in higher order complexes with DNA-binding transcription factors, such as *AP1*, *SEP3* and AGAMOUS-LIKE 24 (Franks et al., 2002; Gregis et al., 2006; Liu and Meyerowitz, 1995; Sridhar et al., 2006). In addition, *AG* expression is repressed in the outer whorls by the *AP2* transcription factor (Drews et al., 1991), which in turn is under negative regulation by the microRNA miR172 (Aukerman and Sakai, 2003; Chen, 2004).

An additional layer of regulatory complexity is introduced by epigenetic silencing of the *AG* locus, which is mediated by trimethylation of lysine 27 on histone H3 proteins. It has been shown

<sup>1</sup>Max-Planck Institute for Developmental Biology, D-72076 Tübingen, Germany. <sup>2</sup>Salk Institute for Biological Studies, La Jolla, CA 92037, USA. <sup>3</sup>University of Heidelberg, D-69120 Heidelberg, Germany.

\*These authors contributed equally to this work

<sup>†</sup>Present address: Whitehead Institute for Biomedical Research, Cambridge, MA 02142, USA

<sup>‡</sup>Present address: California State University, Northridge, CA 91330, USA

<sup>§</sup>Present address: Institute for Clinical Pharmacology, University of Stuttgart, D-70376 Stuttgart, Germany

<sup>¶</sup>Author for correspondence (e-mail: johmann@meristemanian.org)

that these modifications are dependent on a complex containing CURLY LEAF (CLF) and EMBRYONIC FLOWER 2 (EMF2), two members of the polycomb group protein family, as well as the plant-specific protein EMBRYONIC FLOWER 1 (EMF1) (Calonje et al., 2008). Consequently, mutations in the corresponding genes cause ectopic *AG* expression (Goodrich et al., 1997). The activity of the repressor complex is antagonized by ARABIDOPSIS HOMOLOG OF THRITHORAX 1 (ATX1) (Alvarez-Venegas et al., 2003).

As the proper spatiotemporal expression of *AG* involves a plethora of regulators, which act through redundant modules in the large intragenic enhancer, direct identification of important cis-regulatory elements has been difficult. Candidates for cis-regulatory motifs have instead been identified using phylogenetic footprinting and shadowing (Hong et al., 2003), although many of the corresponding trans-factors have remained unknown. Recent studies have shown that regulatory elements have been a driving force for the evolution of floral diversity (Causier et al., 2009). Here, we identify a new activator of *AG*, the bZIP factor PERIANTHIA (PAN), which was previously known to affect floral organ number (Chuang et al., 1999; Running and Meyerowitz, 1996), but not homeotic gene expression.

## MATERIALS AND METHODS

### Plant material

Descriptions of all plant lines used are given in Table 1. All experiments were carried out in the *KB14 AG::GUS* reporter in Col-0 background under long-day conditions, unless otherwise noted.

### Expression analyses

GUS staining was performed as described (Lohmann et al., 2001). In situ hybridizations were performed in accordance with standard protocols (Weigel and Glazebrook, 2002) with the addition of 10% PVA to the staining solution. RNA probes were prepared from full-length cDNAs. Real-time RT-PCR analyses were performed on three replicates of independently grown plant material. RNA from a pool of primary inflorescences was prepared using RNeasy Plant Mini Kit (Qiagen), followed by cDNA synthesis with RevertAid H Minus First Strand cDNA

Synthesis Kit (Fermentas). PCR was carried out in the presence of SYBR Green using *BETA-TUBULIN-2* (At5G62690) for normalization. Primer sequences can be obtained upon request.

### Plasmids

A list of all constructs is given in Table 2.

### Cloning of plant binary vectors

For construction of RH146 the AAGAAT box was deleted from KB8 (Busch et al., 1999) and the 5'AG enhancer was cloned in forward orientation into pDW294 (Busch et al., 1999) by *Bam*HI/*Hind*III restriction sites. pSST210 was obtained using the QuikChange Site-Directed Mutagenesis Kit (Stratagene) on KB8 following the manufacturer's protocol and subcloning of the 5' enhancer into pDW294 using *Bam*HI/*Hind*III. Primer sequences can be obtained upon request.

### Yeast one-hybrid screen

As bait for the yeast one-hybrid screen, the 33 bp AAGAAT box was trimerized using *Xho*I and *Sal*I sites, inserted in the *Xho*I site of pEMBLy22 (Baldari and Cesareni, 1985) to yield pSST90, linearized and integrated into the *URA3* locus of the W303-A1a yeast strain (for detailed information see: <http://wiki.yeastgenome.org/index.php/CommunityW303.html>). Using standard protocols the screen was performed with a cDNA library constructed of RNA from young floral tissue in pEXPAD-502 (Wigge et al., 2005). Double transformants were selected on CSM-TRP/-HIS + 15 mM 3AT plates. Plasmids of positive clones were rescued, re-transformed and confirmed by X-Gal filter-lift-assay before sequencing. For independent confirmation, full-length cDNAs of candidate factors were cloned into pGEM-T easy (Promega) and subcloned into pEXPAD-502 (*TRP1*, Invitrogen). All were transformed stably into the yeast strain EGY48 (Golemis et al., 1996) that contained wild-type or mutated versions of the trimerized AAGAAT box upstream of the *lacZ* reporter in the vector KF1, a derivative of pLG718 (Guarente and Mason, 1983). pSST093 contained the wild-type AAGAAT box sequence, for pSST197 two nucleotides of the putative binding sites for bZIP were mutated [using the QuikChange Site-

**Table 1. Plant lines used in this study**

| Plant line     | Identity                                                       |
|----------------|----------------------------------------------------------------|
| <i>ag-2</i>    | Mutation of <i>AG</i> (At4g18960) in <i>Ws</i> background      |
| <i>KB14</i>    | 5'AG:: <i>GUS</i> reporter (WT)                                |
| N510040        | T-DNA insertion line for At4g13640 <i>UNE16</i>                |
| N514183        | T-DNA insertion line for At1g79430 <i>APL</i>                  |
| N518154        | T-DNA insertion line for At3g12250 <i>TGA6</i>                 |
| N524632        | T-DNA insertion line for At4g37180                             |
| N530112        | T-DNA insertion line for At3g24120                             |
| N557570        | T-DNA insertion line for At1g08320 <i>AtbZIP21</i>             |
| N557609        | T-DNA insertion line for At1g08320 <i>AtbZIP21</i>             |
| N568444        | T-DNA insertion line for At1g79430 <i>APL</i>                  |
| N577802        | T-DNA insertion line for At4g37180                             |
| N591349        | T-DNA insertion line for At1g08320 <i>AtbZIP21</i>             |
| N613627        | T-DNA insertion line for At4g13640 <i>UNE16</i>                |
| N614420        | T-DNA insertion line for At3g24120                             |
| N630355        | T-DNA insertion line for At5g06960 <i>TGA5</i>                 |
| N641618        | T-DNA insertion line for At1g08320 <i>AtbZIP21</i>             |
| N642682        | T-DNA insertion line for At3g24120                             |
| <i>pan</i>     | T-DNA insertion line N557190                                   |
| <i>RH146</i>   | 5'AG:: <i>GUS</i> reporter (AAG box deleted in KB14)           |
| <i>SH57</i>    | <i>CLV3::WUS</i>                                               |
| <i>sSST196</i> | 5'AG:: <i>GUS</i> reporter (mutated bZIP binding site in KB14) |
| <i>sSST262</i> | <i>pan KB14</i>                                                |
| <i>sSST36</i>  | <i>LFY::LFY:VP16</i> in <i>KB14</i>                            |
| <i>sSST41</i>  | <i>LFY::LFY:VP16</i> in <i>RH146</i>                           |

All lines are in a Columbia (Col-0) background (except where indicated).

**Table 2. Plasmids used for yeast assays and preparation of RNA probes**

| Plasmid | Identity                                               |
|---------|--------------------------------------------------------|
| pMD105  | pGEM-T easy <i>WUS</i>                                 |
| pSH57   | pFK317 <i>CLV3::WUS</i>                                |
| pSST090 | pEMBLy22 AAGAAT box trimer                             |
| pSST093 | pKF1 AAGAAT box trimer                                 |
| pSST094 | pGEM-T easy At3g24120                                  |
| pSST095 | pGEM-T easy At3g12250 <i>TGA6</i>                      |
| pSST096 | pGEM-T easy At4g37180                                  |
| pSST097 | pGEM-T easy At5g06960 <i>TGA5</i>                      |
| pSST099 | p424_Gal1 At3g12250 <i>TGA6</i>                        |
| pSST100 | p423_Gal1 At3g24120                                    |
| pSST106 | pEXPAD-502 At5g06960 <i>TGA5</i>                       |
| pSST108 | pGEM-T easy At1g68640 <i>PAN</i>                       |
| pSST109 | pEXPAD-502 At3g12250 <i>TGA6</i>                       |
| pSST110 | p424Gal1 At5g06960 <i>TGA5</i>                         |
| pSST114 | p423Gal1 At4g37180                                     |
| pSST126 | p424Gal1 At1g68640 <i>PAN</i>                          |
| pSST130 | pGEM-T easy At1g79430 <i>APL</i>                       |
| pSST131 | pGEM-T easy At1g08320 <i>AtbZIP21</i>                  |
| pSST137 | p424Gal1 At1g08320 <i>AtbZIP21</i>                     |
| pSST152 | pGEM-T easy At4g13640 <i>UNE16</i>                     |
| pSST155 | p423Gal1 At4g13640 <i>UNE16</i>                        |
| pSST160 | pEXPAD-502 At1g08320 <i>AtbZIP21</i>                   |
| pSST162 | pEXPAD-502 At1g68640 <i>PAN</i>                        |
| pSST167 | pEXPAD-502 At4g37180                                   |
| pSST168 | pEXPAD-502 At4g13640 <i>UNE16</i>                      |
| pSST169 | pEXPAD-502 At3g24120                                   |
| pSST170 | pEXPAD-502 At1g79430 <i>APL</i>                        |
| pSST197 | pKF1 mutated bZIP site in AAGAAT box                   |
| pSST209 | pKF1 mutated GARP sites in AAGAAT box                  |
| pSST210 | pART 5'AG:: <i>GUS</i> mutated bZIP site in AAGAAT box |

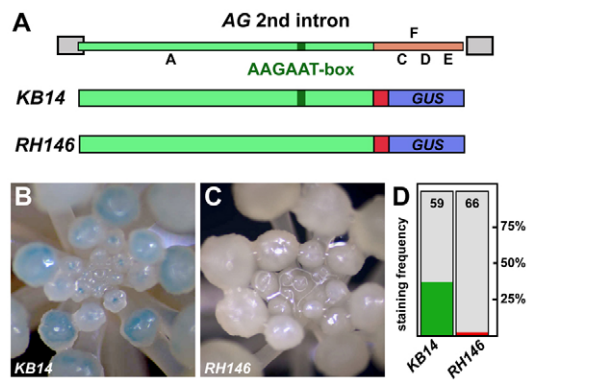

**Fig. 1. Requirement of AAGAAT box for AG enhancer activity.**

(A) Second AG intron. Flanking exons are indicated in gray. Conserved DNA elements are annotated according to Hong et al. (Hong et al., 2003). The 5' enhancer (green) contains a potential LFY-binding site (A) and the 33 bp AAGAAT box (dark green). The 3' enhancer (orange) contains two CarG boxes (C and E), and two linked CCAAT boxes (D). In addition, the 3' enhancer harbors two pairs of LFY/WUS-binding sites (F). For the reporters, regulatory sequences were linked to a minimal CaMV 35S promoter (red) and the coding region for bacterial  $\beta$ -glucuronidase (GUS; blue). RH146 has a 33 bp deletion of the sequence shown in Fig. 2A. (B) GUS activity in a primary inflorescence of a *KB14* plant. (C) GUS expression was lost in *RH146*. (D) The distribution of GUS-positive plants among primary transformants (*KB14*,  $n=59$ ; *RH146*,  $n=66$ ).

Directed Mutagenesis Kit (Stratagene) following the manufacturer's protocol] and the resulting  $\Delta$ bZIP AAGAAT box trimer was inserted using *SpeI/XbaI* sites into KF1. For pSST209 the same procedure was followed by mutating two nucleotides in each of the putative GARP-binding sites as described in Fig. 2A and inserting the fragment into KF1.

#### Transactivation assays

GARP and bZIPs transcription factor cDNAs were cloned in p423Gal1 and p424Gal1 (Mumberg et al., 1994), respectively, and co-transformed into yeast. Liquid cultures were assayed for  $\beta$ -galactosidase activity to quantify transcriptional activation of the AAGAAT box reporter gene. Color reactions were carried out using ONPG (o-nitrophenyl-beta-D-galactoside) as a substrate and an ELISA reader. Relative reporter gene activity was calculated according to Miller (Miller, 1972).

## RESULTS

### A highly conserved cis-regulatory element is essential for AG enhancer function

Phylogenetic footprinting and shadowing had previously been used to identify conserved motifs in the second AG intron, which is essential for proper transcriptional regulation of AG (Busch et al., 1999; Deyholos and Sieburth, 2000; Hong et al., 2003). One of the least variable sequences was the 33-bp-long AAGAAT box, which is not an obvious candidate for a motif bound by known regulators such as LFY, WUS or MADS domain factors (Fig. 1A). Recently, Causier et al. (Causier et al., 2009) have shown that the AAGAAT box has been conserved in sequence and relative position in monocots and dicots, suggesting that it arose before the split of the two lineages roughly 140 million years ago. The enhancer in the second AG intron is composed of two redundant regions (Bombliès et al., 1999; Busch et al., 1999; Deyholos and Sieburth, 2000), and the AAGAAT box is located in the 5' fragment defined by the *KB14* reporter (Fig. 1A), which drives GUS reporter expression in the AG domain (Fig. 1B) (Busch et al., 1999). The deletion of the AAGAAT box in this context (*RH146*) caused a severe reduction of reporter

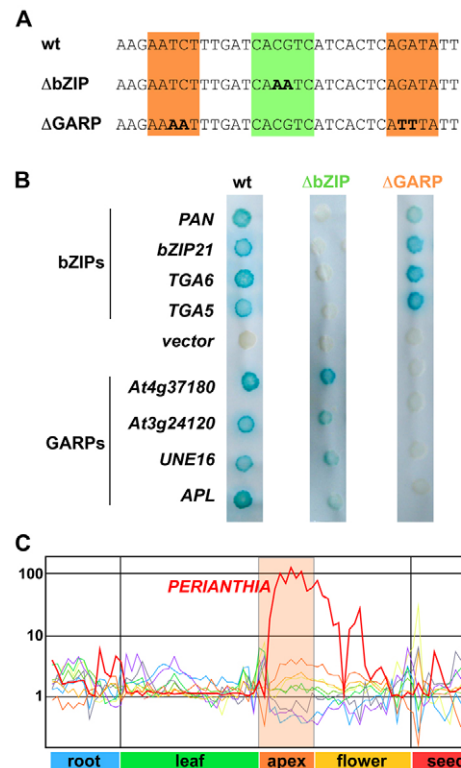

**Fig. 2. Characterization of AAGAAT-interacting factors.**

(A) Sequence of wild-type (wt) and mutated AAGAAT boxes. bZIP and GARP consensus motifs are indicated in green and orange, respectively. Mutated bases are in bold. (B) Yeast one-hybrid assays. The empty pXPAD-502 vector was used as control. (C) Global expression profiles of candidate genes for AAGAAT-interacting factors. Mean normalized expression data are from the AtGenExpress developmental series (Schmid et al., 2005). Red, *PAN*; purple, *bZIP21*; light green, *TGA5*; yellow, *TGA6*; light blue, *APL*; light brown, *UNE16*; orange, *At3g24120*; dark blue, *At4g37180*; olive, *ARR2*.

gene expression (Fig. 1B-D), indicating that this element is essential for activity of the 5' AG enhancer. The AG activator LFY acts through DNA motifs contained in *KB14*, which are distinct from the AAGAAT box. Thus, we crossed *KB14* and *RH146* to plants expressing an activated form of LFY, *LFY:VP16* (Busch et al., 1999; Parcy et al., 1998), to test the functionality of the *RH146* reporter. We observed strong and ectopic GUS expression, confirming that the regulatory input of other factors binding to the 5' AG enhancer is not impaired in the *RH146* lines (see Fig. S1 in the supplementary material).

### Transcription factors of two classes bind to the AAGAAT box

To identify factors that act through the AAGAAT box, we performed a yeast one-hybrid screen, using a cDNA fusion library prepared from RNA of microscopically dissected inflorescence apices (Wigge et al., 2005) and an AAGAAT box trimer as bait (pSST90). Two independent screens of more than 2.5 million transformants identified 50 positive clones, which contained inserts coding for transcription factors of the GARP or bZIP families. We found four different bZIPs, At1g08320/ATBZIP21, At1g68640/PERIANTHIA (*PAN*), At3g12250/TGA6, and At5g06960/TGA5, and five GARP factors, At1g79430/ALTERED PHLOEM DEVELOPMENT

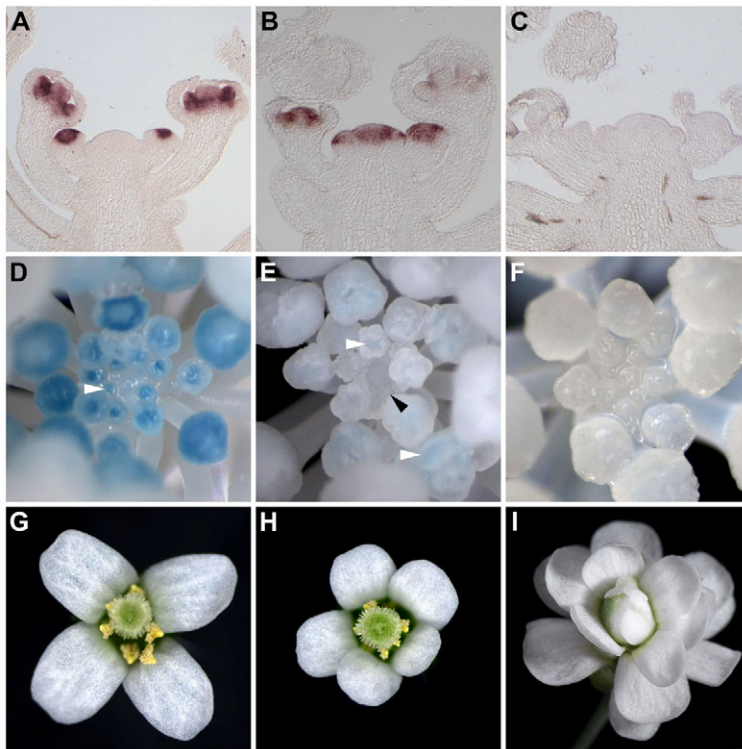

**Fig. 3. Expression, activity and phenotypes of *PAN* and *AG*.** *AG* (A) and *PAN* (B) RNA expression in wild-type flowers. (C) *PAN* RNA was not detected in the *pan* mutant (Salk\_057190 T-DNA insertion line). KB14 GUS expression in primary inflorescences of wild-type (D) and *pan* mutant (E) apices. White arrowheads point to flowers with *AG::GUS* activity; the black arrowhead indicates lack of staining in early *pan* flowers. (F) Point mutations in the bZIP-binding site abolished 5' *AG* enhancer activity. Floral morphologies of wild-type (G), *pan* mutant (H) and *ag* mutant (I) flowers grown in long-day conditions.

(APL), At3g24120, At4g13640/UNFERTILIZED EMBRYO SAC 16 (UNE16), At4g16110/ARABIDOPSIS RESPONSE REGULATOR 2 (ARR2), and At4g37180. Full-length cDNAs of all but ARR2 were fused with the GAL4 activation domain and interaction with the AAGAAT box was confirmed.

The AAGAAT box contains one consensus binding motif for bZIP factors (CACGTC) and two potential GARP-binding motifs (AATCT and AGATA) (Fig. 2A) (Foster et al., 1994; Hosoda et al., 2002). Within the AAGAAT box, these elements were almost invariant, even outside the Brassicaceae (Hong et al., 2003; Causier et al., 2009), supporting the conserved functional importance of these sequences. To determine if the consensus motifs are indeed bona fide binding sites for the identified transcription factors, we selectively mutated them in the context of the yeast reporter construct. Mutations in the putative bZIP-binding site ( $\Delta$ bZIP) (Fig. 2A,B) resulted specifically in the loss of response to the four bZIP factors. Conversely, mutations in the GARP motifs selectively interfered with reporter gene expression in response to the GARP transcription factors ( $\Delta$ GARP) (Fig. 2A,B). These results demonstrated that the bZIP and GARP transcription factors identified in the one-hybrid screen bind in a sequence-specific manner to distinct motifs within the AAGAAT box.

### The bZIP transcription factor *PERIANTHIA* acts on *AG* enhancer sequences in vivo

If any of the identified transcription factors were to play a role in the activation of *AG* transcription, one would expect overlapping expression in early flowers, where *AG* mRNA is first detected. To address this issue, we queried the AtGenExpress database (Schmid et al., 2005). From the nine candidates, only the bZIP transcription factor gene *PAN* showed strong and specific expression in apices and flowers (Fig. 2C) (Chuang et al., 1999), while the other mRNAs are expressed more uniformly across the various tissues. *pan* mutants have prominent defects in floral organ number (Fig. 3G,H) (Chuang

et al., 1999; Running and Meyerowitz, 1996), whereas T-DNA insertion mutants for the other factors identified in the one-hybrid screen did not have any floral phenotypes (see Table 1), suggesting that among the one-hybrid candidates only *PAN* has important roles in flower development, or that genetic redundancy is masking the function of the other regulators.

In situ hybridization confirmed a large overlap of *PAN* and *AG* expression domains in flowers (Fig. 3A,B). To investigate the importance of *PAN* for the activity of *AG* regulatory sequences, we introduced the *KB14* reporter into a *pan* T-DNA insertion mutant, in which *PAN* RNA expression was reduced below the levels detectable by in situ hybridization (Fig. 3B,C). 5' *AG::GUS* reporter activity was drastically reduced in early *pan* flowers (Fig. 3D,E; see Fig. S4 in the supplementary material), with some residual GUS activity at later stages of flower development (Fig. 3E, white arrowheads). These results demonstrated that *PAN* is required for activity of *AG* regulatory elements and were in agreement with *PAN* not being expressed beyond floral stage 7 (Fig. 3B).

A similar effect on *AG::GUS* expression as in the *pan* mutant background was observed when the bZIP-binding site was mutated in the context of the *KB14* reporter (Fig. 3F; see Fig. S4 in the supplementary material). In 18 of 25 primary inflorescences from T1 plants, GUS activity could not be detected at all, while the remaining seven apices showed only weak staining in young flowers. This was consistent with results of transactivation assays in yeast, which showed that *PAN* can synergistically activate transcription from the AAGAAT box in concert with a GARP transcription factor, At4g37180 (see Fig. S2 in the supplementary material), which is expressed in an overlapping domain with *PAN* mRNA (see Fig. S3 in the supplementary material). Interestingly, the closely related TGA proteins showed repressive activity in the same assay (see Fig. S2 in the supplementary material). Taken together, these results confirmed the relevance of *PAN* and the bZIP-binding motif for transcriptional activation mediated by *AG* enhancer sequences.

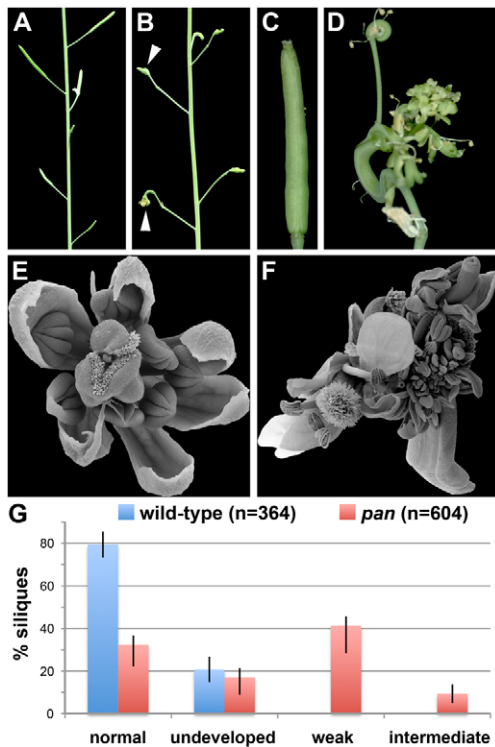

**Fig. 4. Defects in *pan* mutant flowers from plants grown in short-day conditions.** (A-F) Phenotypes of wild-type (A,C) and *pan* (B,D-F) flowers. Note determinacy defects in *pan* mutant (D and arrowheads in B). Scanning electron micrographs of weak (E) and intermediate (F) floral phenotypes of *pan* mutants. (G) Quantification of silique phenotypes (weak phenotype as in Fig. 4E and Fig. S5A in the supplementary material, intermediate as in Fig. 4F; see Figs S5B and S8 in the supplementary material). Fruits of the ‘undeveloped’ category were patterned normally, but did not set seeds.

Quantitative analyses by RT-PCR, however, did not indicate any reduction of endogenous *AG* RNA levels in *pan* mutants (data not shown), suggesting that other factors act redundantly with *PAN*. This is consistent both with *pan* mutants not having *ag*-like defects (Fig. 3G-I) (Running and Meyerowitz, 1996), and with the 5' enhancer fragment (*KB14*) from the second *AG* intron acting redundantly with the non-overlapping 3' enhancer fragment (Fig. 1A) (Busch et al., 1999; Deyholos and Sieburth, 2000).

### ***PAN* is essential for *AG* activation in early flowers of short-day-grown plants**

In contrast to the *pan* mutant defects, which are restricted to flowers, *PAN* protein is much more widely expressed, indicating that *PAN* has redundant functions in several different regulatory networks (Chuang et al., 1999; Running and Meyerowitz, 1996). We speculated that genetic perturbations have so far not been able to fully expose *PAN* function, and we therefore tested whether variations in environmental conditions could be a means to elucidate the role of *PAN* in *AG* activation. Photoperiod has been shown before to affect the phenotypes of plants that are homozygous for a mutation in *AG*, or heterozygous for a mutation in the *AG* activator *LFY* (Okamoto et al., 1996).

Thus, we compared *pan* mutants and wild-type plants grown under short days (SD; 8 hours light), long days (LD; 16 hours light) and continuous light (CL), all at 23°C. Whereas the floral

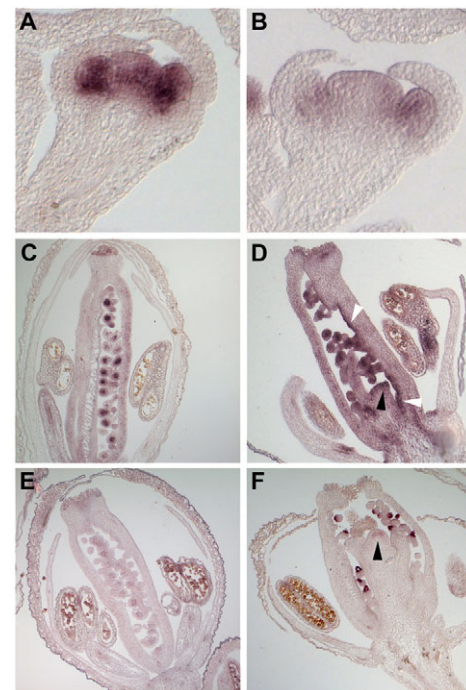

**Fig. 5. Expression of *AG* and *WUS* in *pan* mutant flowers grown in short-day conditions.** (A,B) *AG* RNA in early-stage (stage 5) wild-type (A) and *pan* (B) flowers. (C,D) *AG* RNA in wild-type (C) and *pan* (D) flowers in intermediate stages (stage 11-12) of development. *AG* RNA accumulated ectopically in flowers of *pan* mutants (white arrowheads in D). The black arrowhead in D highlights the meristem-like structure. (E,F) Expression of *WUS* RNA in wild-type (E) and *pan* (F) flowers in intermediate stages of development. The arrowhead in F highlights the meristem-like structure with *WUS* expression.

defects of *pan* mutants grown under CL and LD were limited to the floral organ number defects known before, SD caused a loss of determinacy, reminiscent of *ag* loss-of-function defects (Fig. 4A-F). The phenotypes ranged from partially unfused carpels, which developed into deformed and bulged siliques, to fully unfused central organs that had carpeloid features and on which new floral meristems arose. These meristems in turn produced mostly petaloid, stamenoid and carpeloid tissues (Fig. 4D,F; see Fig. S5 in the supplementary material). These strong phenotypes were most apparent among the first ten flowers of the primary inflorescence. Later-arising flowers showed less severe defects consisting mainly of bulged carpels (Fig. 4B; see Fig. S5A in the supplementary material), which after dissection showed growth of floral organs in an aberrant fifth whorl. Together, these defects were detectable in roughly half of all fruits on the primary inflorescence (Fig. 4G). Similar defects were found in plants carrying other *pan* mutant alleles grown in SD (not shown) and plants expressing dominant-negative alleles of *PAN* in LD (Das et al., 2009). Whereas the reduction of *KB14* activity in *pan* mutant inflorescences (see Fig. S6 in the supplementary material) was similar to that observed in LD-grown plants, SD-grown *pan* mutants showed in addition a marked reduction in *AG* mRNA expression in early flowers (Fig. 5A,B; see Fig. S7 in the supplementary material), which was in agreement with the phenotypic defects.

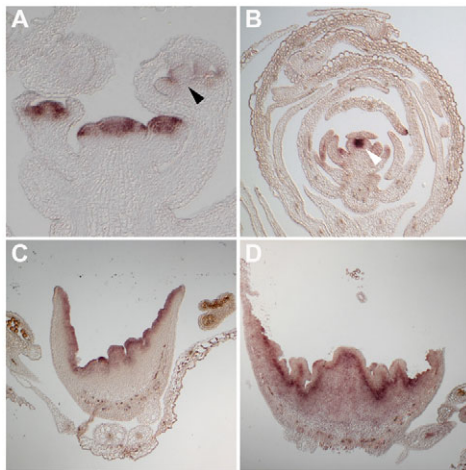

**Fig. 6. Negative feedback between *PAN*, *AG* and *WUS*.**

(A,B) Expression of *PAN* RNA in wild-type (A) and *ag* mutant (B) flowers. The black arrowhead indicates declining *PAN* RNA levels in intermediate floral stages of wild type. The white arrowhead in B points to strong, persisting *PAN* expression in an *ag* mutant flower. (C) *PAN* RNA *CLV3::WUS* plants (SH57). (D) Distribution of *AG* RNA in the same *CLV3::WUS* flower as shown in C.

At later stages of flower development in SD-grown *pan* mutants we detected ectopic expression of *AG* (Fig. 5C,D, white arrowheads) and activation of the *KB14* reporter (see Fig. S8 in the supplementary material), consistent with the ectopic formation of reproductive floral organs (Fig. 4A-F; see Fig. S5C in the supplementary material). This could be regarded as a consequence of losing proper early *AG* activation in *pan* mutants and thus floral meristem determinacy. Consistent with such a scenario, we found tissue outgrowths that resembled floral meristems in shape and tissue layer organization (Fig. 5D, black arrowhead). To determine the identity of these structures more directly, we assayed expression of the stem-cell regulator *WUS* (Mayer et al., 1998). In wild-type flowers, *WUS* expression is terminated in an *AG*-dependent fashion around stage 6, when patterning of the flower is accomplished (Lenhard et al., 2001; Lohmann et al., 2001). In line with the observation of ectopic meristems initiating inside the developing gynoecium of SD-grown *pan* mutants, we observed *WUS* expression in these tissues (Fig. 5F, black arrowhead; see Fig. S9A in the supplementary material). Although during early stages *WUS* expression was rather diffuse in the emerging meristems, once these meristems had firmly established themselves, *WUS* mRNA was confined to the organizing center (see Fig. S9B in the supplementary material). We conclude that ectopic expression of *AG* and *WUS* at later stages of flower development reflects indirect effects of compromised *PAN* activity during earlier stages, and that redundant activators of *AG* are normally active throughout flower development.

Taken together, our results show that *PAN* plays an essential role in the activation of *AG* and that both genes are embedded in a regulatory network that is sensitive to environmental conditions.

### ***PAN* and *AG* are engaged in a negative-feedback loop**

The fact that *PAN* mRNA is not restricted to flowers but is also highly expressed in proliferating cells of the shoot apical meristem suggested more general functions of *PAN* in meristem maintenance. A similar case is represented by *WUS*, which has dual roles in stem-

cell induction and floral patterning via *AG* activation. Consequently, *WUS* expression and thus stem-cell maintenance is terminated during flower development to allow for tissue differentiation, and this process is dependent on *AG* activity (Lenhard et al., 2001; Lohmann et al., 2001). Thus, we tested whether a similar feedback interaction existed between *PAN* and *AG*. Consistent with such a scenario, we found that strong *PAN* RNA expression persisted much longer in *ag* mutant flowers than in wild type (Fig. 6A,B), demonstrating that *PAN* is not only an essential activator of *AG* during early floral stages, but that at the same time *PAN* expression is under control of *AG* at later stages. As the *PAN* expression domain in large parts overlaps with *WUS* RNA, and because *PAN* expression also persists in *clavata* mutants (Chuang et al., 1999), in which *WUS* is ectopically expressed, we investigated whether *WUS* activity might mediate the feedback between *AG* and *PAN*. To this end, we analyzed *PAN* RNA distribution in flowers ectopically expressing *WUS* from the *CLAVATA3* (*CLV3*) promoter (Brand et al., 2002). Flowers of plants with intermediate phenotypes develop meristematic tissues from which stamens and carpeloid organs arise, due to the activation of *AG* in these cells. In agreement with the hypothesis that *WUS* mediates at least a good part of the regulatory interaction between *AG* and *PAN*, we observed ectopic *PAN* expression as well as accumulation of *AG* transcripts in *WUS*-positive cells (Fig. 6C,D).

### **DISCUSSION**

In this study, we have used a short, conserved enhancer motif as a starting point for the identification of a new regulator of *AG* expression, the bZIP transcription factor *PAN*. We have shown that *PAN* not only has an important role in the control of perianth organ number specification (Chuang et al., 1999; Running and Meyerowitz, 1996), but also in the regulation of floral determinacy through the direct activation of *AG*. The identification of *PAN*, which is also expressed in shoot meristems (Running and Meyerowitz, 1996), as an *AG* activator supports the model that flower-specific factors such as *LFY* interact with factors expressed in similar patterns in both shoot and floral meristems to control region- and flower-specific expression of floral homeotic genes (Lee et al., 1997; Lenhard et al., 2001; Lohmann et al., 2001; Parcy et al., 1998).

*PAN* belongs to the D-group of bZIP transcription factors, which share a high degree of sequence similarity in the bZIP region (Jakoby et al., 2002). Intriguingly, all bZIP transcription factors isolated in our screen fall into this group. Despite the fact that we have recovered multiple clones for all factors identified in the screen, we did not isolate all D-group members in our screen. As at least *TGA2* and *TGA3* are expressed at substantial levels in meristematic and floral tissue and therefore should have been represented in our library, it is tempting to speculate that these factors might have different DNA-binding specificities.

The findings that *PAN* can synergize in yeast with the GARP transcription factor At4g37180 and that both share overlapping expression domains in the SAM and early flowers suggest that At4G37180 and related GARP transcription factors are co-factors of *PAN* in *AG* regulation. Regulators of diverse molecular nature can act together in a redundant fashion during flower development and in particular during the activation of *AG*, as recently demonstrated by Prunet et al. (Prunet et al., 2008). However, because the family of GARP transcription factors is rather large (Riechmann et al., 2000), and because we have found members of both GARP subgroups (ARR-B and GARP-G2), it will be difficult to identify and functionally test the most promising candidates for roles in *AG* regulation.

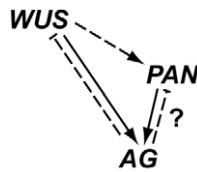

**Fig. 7. Regulatory interactions between WUS, PAN and AG.** WUS activates PAN and AG expression in a feed-forward loop. Once AG protein has accumulated it suppresses WUS transcription, which in turn leads to decreased PAN activation. In addition, AG might act on PAN regulation in a WUS-independent manner. Solid lines indicate known direct interactions, and dashed lines denote hypothetical regulatory mechanisms.

Similar to what has been described for the stem-cell regulator WUS (Lenhard et al., 2001; Lohmann et al., 2001), PAN not only contributes to AG activation but in turn is under negative control by AG during later stages. The finding that WUS is able to ectopically activate PAN expression, along with the fact that PAN RNA also persists in *clv* mutants (Chuang et al., 1999), suggests that WUS could at least partially mediate this feedback regulation. In such a scenario, WUS at the same time contributes to the activation of PAN and AG in a feed-forward loop at early stages of flower development, while the repression of WUS by AG at later stages would also lead to a reduction of PAN expression (Fig. 7). The lack of WUS repression in *ag* mutants (Lenhard et al., 2001; Lohmann et al., 2001) would in turn cause ectopic activation of PAN. However, as only the regulatory interactions between WUS and AG and PAN and AG have been characterized mechanistically, the true nature of this regulatory module remains to be elucidated.

Finally, our work has revealed that other factors must act redundantly with PAN and that this network is sensitive to variation in environmental conditions. This finding shows that the combination of genetic perturbation with environmental variation can be a powerful tool to uncover redundant regulatory mechanisms that are normally not thought to be under environmental control.

We thank Jürgen Berger for help with SEM, Christoph Schuster for plant material, Sascha Laubinger for discussion and Sarah Schilli for technical assistance. This work was supported by fellowships from the Konrad Adenauer Stiftung (A.T.M.) and Boehringer Ingelheim Fonds (H.W.), by NIH grant GM62932 (D.W.) and DFG-AFGN grant LO1450/2-1 (J.U.L.), as well as funds from the EMBO Young Investigator Programme and the HFSP Career Development Award to J.U.L., and the Max Planck Society. Deposited in PMC for release after 12 months.

#### Supplementary material

Supplementary material for this article is available at <http://dev.biologists.org/cgi/content/full/136/10/1613/DC1>

#### References

- Alvarez-Venegas, R., Pien, S., Sadler, M., Witmer, X., Grossniklaus, U. and Avramova, Z. (2003). ATX-1, an Arabidopsis homolog of trithorax, activates flower homeotic genes. *Curr. Biol.* **13**, 627-637.
- Aukerman, M. J. and Sakai, H. (2003). Regulation of flowering time and floral organ identity by a MicroRNA and its APETALA2-like target genes. *Plant Cell* **15**, 2730-2741.
- Baldari, C. and Cesareni, G. (1985). Plasmids pEMBL: new single-stranded shuttle vectors for the recovery and analysis of yeast DNA sequences. *Gene* **35**, 27-32.
- Bombliès, K., Dagenais, N. and Weigel, D. (1999). Redundant enhancers mediate transcriptional repression of AGAMOUS by APETALA2. *Dev. Biol.* **216**, 260-264.
- Bowman, J. L., Smyth, D. R. and Meyerowitz, E. M. (1989). Genes directing flower development in Arabidopsis. *Plant Cell* **1**, 37-52.
- Bowman, J. L., Smyth, D. R. and Meyerowitz, E. M. (1991). Genetic interactions among floral homeotic genes of Arabidopsis. *Development* **112**, 1-20.
- Brand, U., Grunewald, M., Hobe, M. and Simon, R. (2002). Regulation of CLV3 expression by two homeobox genes in Arabidopsis. *Plant Physiol.* **129**, 565-575.
- Busch, M. A., Bombliès, K. and Weigel, D. (1999). Activation of a floral homeotic gene in Arabidopsis. *Science* **285**, 585-587.
- Calonje, M., Sanchez, R., Chen, L. and Sung, Z. R. (2008). EMBRYONIC FLOWER1 participates in polycomb group-mediated AG gene silencing in Arabidopsis. *Plant Cell* **20**, 277-291.
- Castillejo, C., Romera-Branchat, M. and Pelaz, S. (2005). A new role of the Arabidopsis SEPALLATA3 gene revealed by its constitutive expression. *Plant J.* **43**, 586-596.
- Causier, B., Bradley, D., Cook, H. and Davies, B. (2009). Conserved intragenic elements were critical for the evolution of the floral C-function. *Plant J.* **58**, 41-52.
- Chen, X. (2004). A microRNA as a translational repressor of APETALA2 in Arabidopsis flower development. *Science* **303**, 2022-2025.
- Chuang, C. F., Running, M. P., Williams, R. W. and Meyerowitz, E. M. (1999). The PERIANTHIA gene encodes a bZIP protein involved in the determination of floral organ number in Arabidopsis thaliana. *Genes Dev.* **13**, 334-344.
- Coen, E. S. and Meyerowitz, E. M. (1991). The war of the whorls: genetic interactions controlling flower development. *Nature* **353**, 31-37.
- Das, P., Ito, T., Wellmer, F., Vernoux, T., Dedieu, A., Traas, J. and Meyerowitz, E. M. (2009). Floral stem cell termination involves the direct regulation of AGAMOUS by PERIANTHIA. *Development* **136**, 1605-1611.
- Deyholos, M. K. and Sieburth, L. E. (2000). Separable whorl-specific expression and negative regulation by enhancer elements within the AGAMOUS second intron. *Plant Cell* **12**, 1799-1810.
- Ditta, G., Pinyopich, A., Robles, P., Pelaz, S. and Yanofsky, M. F. (2004). The SEP4 gene of Arabidopsis thaliana functions in floral organ and meristem identity. *Curr. Biol.* **14**, 1935-1940.
- Drews, G. N., Bowman, J. L. and Meyerowitz, E. M. (1991). Negative regulation of the Arabidopsis homeotic gene AGAMOUS by the APETALA2 product. *Cell* **65**, 991-1002.
- Foster, R., Izawa, T. and Chua, N. H. (1994). Plant bZIP proteins gather at ACGT elements. *FASEB J.* **8**, 192-200.
- Franks, R. G., Wang, C., Levin, J. Z. and Liu, Z. (2002). SEUSS, a member of a novel family of plant regulatory proteins, represses floral homeotic gene expression with LEUNIG. *Development* **129**, 253-263.
- Golemis, E. A., Gyuris, J. and Brent, R. (1996). Interaction trap/two-hybrid system to identify interacting proteins. In *Current Protocols in Molecular Biology*, vol. 3 (ed. F. M. Ausubel, R. Brent, R. E. Kingston, D. D. Moore, J. G. Seidman, J. A. Smyth and K. Struhl), pp. 20.1.1-20.1.28. New York: John Wiley.
- Gomez-Mena, C., de Folter, S., Costa, M. M., Angenent, G. C. and Sablowski, R. (2005). Transcriptional program controlled by the floral homeotic gene AGAMOUS during early organogenesis. *Development* **132**, 429-438.
- Goodrich, J., Puangsomlee, P., Martin, M., Long, D., Meyerowitz, E. M. and Coupland, G. (1997). A Polycomb-group gene regulates homeotic gene expression in Arabidopsis. *Nature* **386**, 44-48.
- Gregis, V., Sessa, A., Colombo, L. and Kater, M. M. (2006). AGL24, SHORT VEGETATIVE PHASE, and APETALA1 redundantly control AGAMOUS during early stages of flower development in Arabidopsis. *Plant Cell* **18**, 1373-1382.
- Guarente, L. and Mason, T. (1983). Heme regulates transcription of the CYC1 gene of *S. cerevisiae* via an upstream activation site. *Cell* **32**, 1279-1286.
- Hong, R. L., Hamaguchi, L., Busch, M. A. and Weigel, D. (2003). Regulatory elements of the floral homeotic gene AGAMOUS identified by phylogenetic footprinting and shadowing. *Plant Cell* **15**, 1296-1309.
- Honma, T. and Goto, K. (2001). Complexes of MADS-box proteins are sufficient to convert leaves into floral organs. *Nature* **409**, 525-529.
- Hosoda, K., Imamura, A., Katoh, E., Hatta, T., Tachiki, M., Yamada, H., Mizuno, T. and Yamazaki, T. (2002). Molecular structure of the GARP family of plant Myb-related DNA binding motifs of the Arabidopsis response regulators. *Plant Cell* **14**, 2015-2029.
- Jakoby, M., Weisshaar, B., Droge-Laser, W., Vicente-Carbajosa, J., Tiedemann, J., Kroj, T. and Parcy, F. (2002). bZIP transcription factors in Arabidopsis. *Trends Plant Sci.* **7**, 106-111.
- Lee, I., Wolfe, D. S., Nilsson, O. and Weigel, D. (1997). A LEAFY co-regulator encoded by UNUSUAL FLORAL ORGANS. *Curr. Biol.* **7**, 95-104.
- Lenhard, M., Bohnert, A., Jürgens, G. and Laux, T. (2001). Termination of stem cell maintenance in Arabidopsis floral meristems by interactions between WUSCHEL and AGAMOUS. *Cell* **105**, 805-814.
- Liu, Z. and Meyerowitz, E. M. (1995). LEUNIG regulates AGAMOUS expression in Arabidopsis flowers. *Development* **121**, 975-991.
- Lohmann, J. U. and Weigel, D. (2002). Building beauty: the genetic control of floral patterning. *Dev. Cell* **2**, 135-142.
- Lohmann, J. U., Hong, R. L., Hobe, M., Busch, M. A., Parcy, F., Simon, R. and Weigel, D. (2001). A molecular link between stem cell regulation and floral patterning in Arabidopsis. *Cell* **105**, 793-803.

- Mayer, K. F., Schoof, H., Haecker, A., Lenhard, M., Jürgens, G. and Laux, T. (1998). Role of WUSCHEL in regulating stem cell fate in the Arabidopsis shoot meristem. *Cell* **95**, 805-815.
- Melzer, R., Verelst, W. and Theissen, G. (2009). The class E floral homeotic protein SEPALLATA3 is sufficient to loop DNA in 'floral quartet'-like complexes *in vitro*. *Nucleic Acids Res.* **37**, 144-157.
- Miller, J. H. (1972). *Experiments in Molecular Genetics*. Cold Spring Harbor, NY: Cold Spring Harbor Laboratory Press.
- Mizukami, Y. and Ma, H. (1995). Separation of AG function in floral meristem determinacy from that in reproductive organ identity by expressing antisense AG RNA. *Plant Mol. Biol.* **28**, 767-784.
- Mumberg, D., Muller, R. and Funk, M. (1994). Regulatable promoters of *Saccharomyces cerevisiae*: comparison of transcriptional activity and their use for heterologous expression. *Nucleic Acids Res.* **22**, 5767-5768.
- Okamoto, J. K., den Boer, B. G. W., Lotys-Prass, C., Szeto, W. and Jofuku, K. D. (1996). Flowers into shoots: photo and hormonal control of a meristem identity switch in *Arabidopsis*. *Proc. Natl. Acad. Sci. USA* **93**, 13831-13836.
- Parcy, F., Nilsson, O., Busch, M. A., Lee, I. and Weigel, D. (1998). A genetic framework for floral patterning. *Nature* **395**, 561-566.
- Parcy, F., Bomblies, K. and Weigel, D. (2002). Interaction of LEAFY, AGAMOUS and TERMINAL FLOWER1 in maintaining floral meristem identity in *Arabidopsis*. *Development* **129**, 2519-2527.
- Pelaz, S., Ditta, G. S., Baumann, E., Wisman, E. and Yanofsky, M. F. (2000). B and C floral organ identity functions require SEPALLATA MADS-box genes. *Nature* **405**, 200-203.
- Prunet, N., Morel, P., Thierry, A. M., Eshed, Y., Bowman, J. L., Negrutiu, I. and Trehin, C. (2008). REBELOTE, SQUINT, and ULTRAPETALA1 function redundantly in the temporal regulation of floral meristem termination in *Arabidopsis thaliana*. *Plant Cell* **20**, 901-919.
- Riechmann, J. L., Heard, J., Martin, G., Reuber, L., Jiang, C., Keddie, J., Adam, L., Pineda, O., Ratcliffe, O. J., Samaha, R. R. et al. (2000). Arabidopsis transcription factors: genome-wide comparative analysis among eukaryotes. *Science* **290**, 2105-2110.
- Running, M. P. and Meyerowitz, E. M. (1996). Mutations in the *PERIANTHIA* gene of *Arabidopsis* specifically alter floral organ number and initiation pattern. *Development* **122**, 1261-1269.
- Schmid, M., Davison, T. S., Henz, S. R., Pape, U. J., Demar, M., Vingron, M., Schölkopf, B., Weigel, D. and Lohmann, J. U. (2005). A gene expression map of *Arabidopsis thaliana* development. *Nat. Genet.* **37**, 501-506.
- Sieburth, L. E. and Meyerowitz, E. M. (1997). Molecular dissection of the AGAMOUS control region shows that cis elements for spatial regulation are located intragenically. *Plant Cell* **9**, 355-365.
- Sieburth, L. E., Running, M. P. and Meyerowitz, E. M. (1995). Genetic separation of third and fourth whorl functions of AGAMOUS. *Plant Cell* **7**, 1249-1258.
- Sridhar, V. V., Surendrarao, A. and Liu, Z. (2006). APETALA1 and SEPALLATA3 interact with SEUSS to mediate transcription repression during flower development. *Development* **133**, 3159-3166.
- Theissen, G., Kim, J. T. and Saedler, H. (1996). Classification and phylogeny of the MADS-box multigene family suggest defined roles of MADS-box gene subfamilies in the morphological evolution of eukaryotes. *J. Mol. Evol.* **43**, 484-516.
- Weigel, D. and Glazebrook, J. (2002). *Arabidopsis: A Laboratory Manual*. Cold Spring Harbor, NY: Cold Spring Harbor Laboratory Press.
- Wigge, P. A., Kim, M. C., Jaeger, K. E., Busch, W., Schmid, M., Lohmann, J. U. and Weigel, D. (2005). Integration of spatial and temporal information during floral induction in *Arabidopsis*. *Science* **309**, 1056-1059.
- Yanofsky, M. F., Ma, H., Bowman, J. L., Drews, G. N., Feldmann, K. A. and Meyerowitz, E. M. (1990). The protein encoded by the *Arabidopsis* homeotic gene *agamous* resembles transcription factors. *Nature* **346**, 35-39.
